# Supplementary material
Source: publisher site journal article supplement (http://www.degruyter.com/publication/journal_key/PHYS/downloadAsset/PHYS_Article%20Processing%20Charges.pdf)
Supplement: Supplementary file 1 [file PHYS_Article%20Processing%20Charges.pdf]

## Article Processing Charges | Open Physics

EFFECTIVE JANUARY 2019

---

In order to sustain the production of our fully-refereed open access journal, each article accepted for publication in *Open Physics* is subject to an **Article Processing Charge of 1000 EUR**. This fee is used to cover the costs of the peer-review process, professional typesetting and copyediting, as well as online hosting, long-term preservation, distribution to libraries and content aggregators worldwide, and extensive promotion to potential readers.

Editors and reviewers are not involved in author payment process and do not discuss charges with authors. The ability to pay does not influence whether or not a manuscript is accepted for publication.

Information regarding payment of these charges will be provided following acceptance for publication. There are no submission charges – Article Processing Charges apply after the acceptance of a manuscript. Articles Processing Charges are collected via RightsLink® system (provided by Copyright Clearance Center). The payment can be made in EUR, USD or GBP, and may be subject to VAT when applicable.

### Waiver Policies

If the submitting author is affiliated with an organization which has [an open access agreement](#) with De Gruyter, the article processing charges (APCs) may be covered or discounted. Authors who do not fulfill these criteria can also request a waiver or a discount during the submission process. All inquiries concerning Article Processing Charges should be addressed **before or immediately after submission of a paper** to the Managing Editor at the email address given at the bottom of the page.

### Funding Opportunities

Authors who are looking for funds to support the payment of Article Processing Charges have a number of options to consider. For details visit our [website](#).

### Editorial Office

Managing Editor:

Juliusz Skoryna

De Gruyter Poland Ltd.

Bogumiła Zuga 32A

01-811 Warsaw / Poland

Tel: +48 22 701 50 15

E-mail: [Juliusz.Skoryna@degruyter.com](mailto:Juliusz.Skoryna@degruyter.com)

Website: <https://www.degruyter.com/view/i/phys>
